# Supplementary material for: A novel transformation of a zirconium imido compound and the development of a new class of N3donor heteroscorpionate ligand
Source: Royal Society of Chemistry journal article supplement (doi:10.1039/b513927a), 2005-11-21
Supplement: b513927a.pdf [file b513927a.pdf]

## A Novel Transformation of a Zirconium Imido Compound and the Development of a New Class of N<sub>3</sub> Donor Heteroscorpionate Ligand

Robert G. Howe, Cara S. Tredget, Sally C. Lawrence, Suparabhorn Subongkoj, Andrew R. Cowley  
and Philip Mountford

---

### Electronic supporting information: characterising data

---

#### [Zr(N-2,6-C<sub>6</sub>H<sub>3</sub><sup>i</sup>Pr<sub>2</sub>){MeSi(3,5-Me<sub>2</sub>pz)<sub>2</sub>}Cl<sub>3</sub>] (1)

<sup>1</sup>H NMR Data (CD<sub>2</sub>Cl<sub>2</sub>, 300 MHz, 298 K): 7.10 (3H, s, *m*- and *p*-C<sub>6</sub>H<sub>3</sub><sup>i</sup>Pr), 6.03 (2H, s, 4-N<sub>2</sub>C<sub>3</sub>Me<sub>2</sub>H), 3.06 (2H, sept, <sup>3</sup>J = 6.9 Hz C<sub>6</sub>H<sub>3</sub>(CHMe<sub>2</sub>)<sub>2</sub>), 2.62 (6H, s, 3-N<sub>2</sub>C<sub>3</sub>Me<sub>2</sub>H), 2.37 (6H, s, 5-N<sub>2</sub>C<sub>3</sub>Me<sub>2</sub>H), 1.17 (6H, d, <sup>3</sup>J = 6.9 Hz C<sub>6</sub>H<sub>3</sub>(CHMe<sub>2</sub>)<sub>2</sub>dn), 0.90 (3H, s, SiMe), 0.84 (6H, d, <sup>3</sup>J = 6.6 Hz C<sub>6</sub>H<sub>3</sub>(CHMe<sub>2</sub>)<sub>2</sub> up). <sup>13</sup>C-<sup>1</sup>H NMR data (CD<sub>2</sub>Cl<sub>2</sub>, 125.7 MHz, 298 K): 158.5 (*ipso*-C<sub>6</sub>H<sub>3</sub><sup>i</sup>Pr<sub>2</sub>), 147.5 (3-N<sub>2</sub>C<sub>3</sub>Me<sub>2</sub>H), 144.3 (5-N<sub>2</sub>C<sub>3</sub>Me<sub>2</sub>H), 125.5 (*m*- or *p*-C<sub>6</sub>H<sub>3</sub><sup>i</sup>Pr<sub>2</sub>), 124.5 (*o*-C<sub>6</sub>H<sub>3</sub><sup>i</sup>Pr<sub>2</sub>), 110.2 (4-N<sub>2</sub>C<sub>3</sub>Me<sub>2</sub>H), 28.4 {C<sub>6</sub>H<sub>3</sub>(CHMe<sub>2</sub>)<sub>2</sub>}, 25.9 {C<sub>6</sub>H<sub>3</sub>(CHMe<sub>2</sub>)<sub>2</sub> u}, 23.8 {C<sub>6</sub>H<sub>3</sub>(CHMe<sub>2</sub>)<sub>2</sub> dn}, 15.4 (3-N<sub>2</sub>C<sub>3</sub>Me<sub>2</sub>H), 13.0 (5-N<sub>2</sub>C<sub>3</sub>Me<sub>2</sub>H), -3.9 (SiMe). IR data (NaCl plates, Nujol, cm<sup>-1</sup>): 2360(w), 1543(m), 1418(w), 1338(w), 1316(w), 1273(m), 1262(m), 1242(w), 1184(w), 1099(m), 1041(m), 938(w), 834(m), 801(s), 739(w), 590(w), 501(w). Anal. found: calculated for (C<sub>23</sub>H<sub>34</sub>Cl<sub>3</sub>N<sub>5</sub>SiZr·1.25CH<sub>2</sub>Cl<sub>2</sub>) C, 41.0 (40.7); N, 10.0 (9.8); H, 4.7 (5.1) %. EI<sup>+</sup> MS: *m/z* = 603 [Zr(N-2,6-C<sub>6</sub>H<sub>3</sub><sup>i</sup>Pr<sub>2</sub>){MeSi(3,5-Me<sub>2</sub>pz)<sub>2</sub>}Cl<sub>3</sub>], 35%, *m/z* = 509 [Zr(N-2,6-C<sub>6</sub>H<sub>3</sub><sup>i</sup>Pr<sub>2</sub>){MeSi(3,5-Me<sub>2</sub>pz)Cl<sub>3</sub>}], 80%, *m/z* = 313 [Zr(N-2,6-C<sub>6</sub>H<sub>3</sub><sup>i</sup>Pr<sub>2</sub>)(SiMe)], 100%.

#### [HC(Me<sub>2</sub>pz)<sub>2</sub>SiMe<sub>2</sub>Cl] (2)

<sup>1</sup>H NMR data (C<sub>6</sub>D<sub>6</sub>, 300.0 MHz, 298 K): 5.69 (1 H, s, HC(3,5-Me<sub>2</sub>pz)<sub>2</sub>(SiMe<sub>2</sub>Cl)), 5.62 (2 H, s, 4-H-pz), 2.08 (6 H, s, 5-Me-pz), 1.76 (6 H, s, 3-Me-pz), 0.97 (6 H, s, SiMe<sub>2</sub>). <sup>13</sup>C-<sup>1</sup>H NMR data (C<sub>6</sub>D<sub>6</sub>, 75.0 MHz, 298 K): 147.4 (5-pz), 139.3 (3-pz), 106.1 (4-pz), 66.4 (HC(3,5-Me<sub>2</sub>pz)<sub>2</sub>(SiMe<sub>2</sub>Cl)), 13.6 (5-Me-pz), 10.7 (3-Me-pz), 3.9 (SiMe<sub>2</sub>). I.R. data (NaCl plates, Nujol mull, cm<sup>-1</sup>): 1558 (s), 1414 (s), 1381 (m), 1352 (m), 1324 (m), 1245 (s), 1031 (m), 975 (w), 882 (m), 752 (w), 711 (w), 673 (m). Anal. found: (calculated for C<sub>13</sub>H<sub>21</sub>ClN<sub>4</sub>): C, 53.2 (52.6); N, 19.1 (18.9); H, 7.1 (7.1) %. EI<sup>+</sup> MS: *m/z* = 296 [HC(3,5-Me<sub>2</sub>pz)<sub>2</sub>(SiMe<sub>2</sub>Cl)]<sup>+</sup>, 80%, *m/z* = 261 [HC(3,5-Me<sub>2</sub>pz)<sub>2</sub>(SiMe<sub>2</sub>)]<sup>+</sup>, 100%.

**[HC(Me<sub>2</sub>pz)<sub>2</sub>SiMe<sub>2</sub>N(H)<sup>i</sup>Pr] (3)**

<sup>1</sup>H NMR data (C<sub>6</sub>D<sub>6</sub>, 300.0 MHz, 298 K): 5.96 (1 H, s, HC(3,5-Me<sub>2</sub>pz)<sub>2</sub>(SiMe<sub>2</sub>NH<sup>i</sup>Pr), 5.65 (2 H, s, 4-H-pz), 3.11 (1 H, sept, <sup>3</sup>J = 6.0 Hz, H<sub>C</sub>Me<sub>2</sub>), 2.15 (6 H, s, 5-Me-pz), 1.83 (6 H, s, 3-Me-pz), 0.97 (6 H, d, <sup>3</sup>J = 6.3 Hz, H<sub>C</sub>Me<sub>2</sub>), 0.38 (6 H, s, SiMe<sub>2</sub>). <sup>13</sup>C-<sup>1</sup>H NMR data (C<sub>6</sub>D<sub>6</sub>, 75 MHz, 298 K): 146.5 (5-pz), 139.9 (3-pz), 106.3 (4-pz), 69.8 (HC(3,5-Me<sub>2</sub>pz)<sub>2</sub>(SiMe<sub>2</sub>NH<sup>i</sup>Pr)), 43.5 (H<sub>C</sub>Me<sub>2</sub>), 28.0 (H<sub>C</sub>Me<sub>2</sub>), 13.7 (5-Me-pz), 10.9 (3-Me-pz), -0.8 (SiMe<sub>2</sub>). I.R. data (NaCl plates, Nujol mull, cm<sup>-1</sup>): 2960 (s), 1554 (m), 1358 (m), 1320 (w), 1259 (s), 1167 (w), 1023 (s), 881 (w). Anal. found: (calculated for C<sub>16</sub>H<sub>29</sub>N<sub>5</sub>Si) C, 60.0 (60.1); N, 21.9 (21.9); H, 9.0 (9.2) %. EI<sup>+</sup> MS: *m/z* = 289 [HC(3,5-Me<sub>2</sub>pz)<sub>2</sub>(SiNH<sup>i</sup>Pr)]<sup>+</sup>, 30%, *m/z* = 261 [HC(3,5-Me<sub>2</sub>pz)<sub>2</sub>(SiMe<sub>2</sub>)]<sup>+</sup>, 20%, *m/z* = 224 [HC(3,5-Me<sub>2</sub>pz)(SiMe<sub>2</sub>NH<sup>i</sup>Pr)]<sup>+</sup>, 52%.

**[Zr{HC(Me<sub>2</sub>pz)<sub>2</sub>SiMe<sub>2</sub>N<sup>i</sup>Pr}(CH<sub>2</sub>SiMe<sub>3</sub>)<sub>3</sub>] (4)**

<sup>1</sup>H NMR data (CD<sub>2</sub>Cl<sub>2</sub>, 300.0 MHz, 248 K): 5.90 (2 H, s, 4-H-pz), 5.43 (1 H, s, HC(Me<sub>2</sub>pz)<sub>2</sub>), 4.48 (1 H, sept., <sup>3</sup>J = 5.87, H<sub>C</sub>Me<sub>2</sub>), 2.31 (overlapping, 12 H, s, 3,5-Me<sub>2</sub>pz), 1.19 (6 H, d, <sup>3</sup>J = 5.86, H<sub>C</sub>Me<sub>2</sub>), 0.78 (2 H, d, <sup>2</sup>J = 11.56, CH<sub>2</sub>SiMe<sub>3</sub>), 0.50 (2 H, d, <sup>2</sup>J = 11.56, CH<sub>2</sub>SiMe<sub>3</sub>), 0.02 (2 H, s, CH<sub>2</sub>SiMe<sub>3</sub>), -0.05 (18 H, s, CH<sub>2</sub>SiMe<sub>3</sub>), -0.11 (6 H, s, SiMe<sub>2</sub>), -0.34 (9 H, s, SiMe<sub>3</sub>) ppm. <sup>13</sup>C-<sup>1</sup>H NMR data (CD<sub>2</sub>Cl<sub>2</sub>, 75 MHz, 248 K): 149.6 (3-pz), 138.9 (5-pz), 106.8 (4-pz), 62.2 (HC(pz)), 59.1 (CH<sub>2</sub>SiMe<sub>3</sub>), 44.7 (H<sub>C</sub>Me<sub>2</sub>), 41.4 (CH<sub>2</sub>SiMe<sub>3</sub>), 28.2 (H<sub>C</sub>Me<sub>2</sub>), 15.7 (3,5-Me<sub>2</sub>pz), 11.4 (3,5-Me<sub>2</sub>pz), 2.7 (SiMe<sub>3</sub>), 2.63 (SiMe<sub>2</sub>), 0.95 (SiMe<sub>3</sub>) ppm. I.R. data (NaCl plates, Nujol mull, cm<sup>-1</sup>): 1558 (w), 1418 (m), 1259 (s), 1241 (s), 1153 (m), 898 (s), 850 (s), 821 (s), 786 (s). Anal. found: (calculated for C<sub>28</sub>H<sub>61</sub>N<sub>5</sub>Si<sub>4</sub>Zr): C, 46.8 (50.1); N, 10.0 (10.4); H, 9.1 (9.2) %. The low %C analysis of this spectroscopically pure sample is attributed to incomplete combustion (carbide formation) or thermal degradation (e.g., elimination of SiMe<sub>4</sub> and alkylidene formation) before combustion starts.

**[Sc{HC(Me<sub>2</sub>pz)<sub>2</sub>SiMe<sub>2</sub>N<sup>i</sup>Pr}(CH<sub>2</sub>SiMe<sub>3</sub>)<sub>2</sub>] (5)**

<sup>1</sup>H NMR data (C<sub>6</sub>D<sub>6</sub>, 300.0 MHz, 298 K): 5.23 (2 H, s, 4-H-pz), 5.05 (1 H, s, HC(3,5-Me<sub>2</sub>pz)<sub>2</sub>(SiMe<sub>2</sub>NH<sup>i</sup>Pr)), 4.75 (1 H, sept, <sup>3</sup>J = 6.4 Hz, H<sub>C</sub>Me<sub>2</sub>), 2.35 (6 H, s, 3-Me-pz), 1.50 (6 H, s, 5-Me-pz), 1.47 (6 H, d, <sup>3</sup>J = 6.5 Hz, H<sub>C</sub>Me<sub>2</sub>), 0.54 (4 H, d, CH<sub>2</sub>SiMe<sub>3</sub>), 0.45 (18 H, s, SiMe<sub>3</sub>), -0.01 (6 H, s, SiMe<sub>2</sub>). <sup>13</sup>C-<sup>1</sup>H NMR data (C<sub>6</sub>D<sub>6</sub>, 75 MHz, 298 K): 150.8 (3-pz), 139.0 (5-pz), 107.0 (4-pz), 64.4 (HC(3,5-Me<sub>2</sub>pz)<sub>2</sub>(SiMe<sub>2</sub>NH<sup>i</sup>Pr)), 47.1 (SiMe<sub>2</sub>), 36.8 (H<sub>C</sub>Me<sub>2</sub>), 29.7 (H<sub>C</sub>Me<sub>2</sub>), 15.0 (3-Me-pz), 10.4 (5-Me-pz), 4.5 (SiMe<sub>3</sub>), 1.9 (CH<sub>2</sub>SiMe<sub>2</sub>). I.R. data (NaCl plates, Nujol mull, cm<sup>-1</sup>): 2854 (s), 1556 (w), 1461 (s), 1376 (s), 1163 (w), 1023 (w), 856 (m). Anal. found: (calculated for C<sub>24</sub>H<sub>50</sub>N<sub>5</sub>Si<sub>3</sub>Sc): C, 53.5 (53.6); N, 13.0 (13.0); H, 9.5 (9.4) %.

**[Y{HC(Me<sub>2</sub>pz)<sub>2</sub>SiMe<sub>2</sub>N<sup>i</sup>Pr}(CH<sub>2</sub>SiMe<sub>3</sub>)<sub>2</sub>(THF)] (6)**

<sup>1</sup>H NMR data (C<sub>6</sub>D<sub>6</sub>, 300.0 MHz, 298 K): 5.23 (2 H, s, 4-H-pz), 5.05 (1 H, s, HC(3,5-Me<sub>2</sub>pz)<sub>2</sub>(SiMe<sub>2</sub>NH<sup>i</sup>Pr)), 4.75 (1 H, sept, <sup>3</sup>J = 6.4 Hz, HCMe<sub>2</sub>), 4.68 (4 H, m, OCH<sub>2</sub>CH<sub>2</sub>), 2.35 (6 H, s, 3-Me-pz), 1.50 (6 H, s, 5-Me-pz), 1.45 (6 H, d, <sup>3</sup>J = 6.2 Hz, HCMe<sub>2</sub>), 1.19 (4 H, m, OCH<sub>2</sub>CH<sub>2</sub>) 0.44 (18 H, s, SiMe<sub>3</sub>), 0.29 (6 H, s, SiMe<sub>2</sub>), -0.01 (4 H, d, CH<sub>2</sub>SiMe<sub>3</sub>). <sup>13</sup>C-<sup>1</sup>H NMR data (C<sub>6</sub>D<sub>6</sub>, 75.0 MHz, 298 K): 149.9 (3-pz), 139.0 (5-pz), 106.3 (4-pz), 69.6 (HCMe<sub>2</sub>), 65.1 (HC(3,5-Me<sub>2</sub>pz)<sub>2</sub>(SiMe<sub>2</sub>NH<sup>i</sup>Pr)), 30.9 (HCMe<sub>2</sub>), 28.6 (d, CH<sub>2</sub>SiMe<sub>3</sub>), 14.7 (3-Me-pz), 10.9 (5-Me-pz), 5.1 (SiMe<sub>3</sub>), 2.9 (SiMe<sub>2</sub>). I.R. data (NaCl plates, Nujol mull, cm<sup>-1</sup>): 2924 (s), 2854 (s), 1555 (w), 1459 (s), 1376 (m), 1231 (m), 1178 (m), 862 (s), 792 (m), 770 (m), 756 (m), 727 (w). Elemental analysis for C<sub>28</sub>H<sub>50</sub>N<sub>5</sub>OSi<sub>3</sub>Y: Found (calculated): C, 51.3 (51.4); N, 10.6 (10.7); H, 8.8 (8.9) %.

**[Zr{HC(Me<sub>2</sub>pz)<sub>2</sub>SiMe<sub>2</sub>N<sup>i</sup>Pr}(CH<sub>2</sub>SiMe<sub>3</sub>)<sub>2</sub>][B(Ar<sup>F</sup>)<sub>4</sub>] (7) (NMR tube scale)**

<sup>1</sup>H NMR (CD<sub>2</sub>Cl<sub>2</sub>, 300.0 MHz, 298 K). 6.12 (2 H, s, 4-H-pz), 5.86 (1 H, s, HCpz), 4.41 (1 H, sept., <sup>3</sup>J = 6.17 Hz, HCMe<sub>2</sub>), 2.44 (6 H, s, 3,5-Me<sub>2</sub>pz), 2.37 (6 H, s, 3,5-Me<sub>2</sub>pz), 1.59 (2 H, d, <sup>2</sup>J = 11.45, CH<sub>2</sub>SiMe<sub>3</sub>), 1.51 (6 H, d, <sup>3</sup>J = 6.46 Hz, HCMe<sub>2</sub>), 1.10 (2 H, d, <sup>2</sup>J = 11.16 Hz, CH<sub>2</sub>SiMe<sub>3</sub>), 0.08 (6H, s, SiMe<sub>2</sub>), 0.03 (18 H, s, CH<sub>2</sub>SiMe<sub>3</sub>). <sup>19</sup>F NMR (CD<sub>2</sub>Cl<sub>2</sub>, 282.1 MHz, 298 K): -133.56 (*o*-C<sub>6</sub>F<sub>5</sub>), -164.11 (*p*-C<sub>6</sub>F<sub>5</sub>), -167.98 (*m*-C<sub>6</sub>F<sub>5</sub>).

**[Sc{HC(Me<sub>2</sub>pz)<sub>2</sub>SiMe<sub>2</sub>N<sup>i</sup>Pr}(CH<sub>2</sub>SiMe<sub>3</sub>)(THF)][B(Ar<sup>F</sup>)<sub>4</sub>] (8) (NMR tube scale)**

<sup>1</sup>H NMR data (CD<sub>2</sub>Cl<sub>2</sub>, 300.0 MHz, 298 K): 6.08 (2 H, s, 4-H-pz), 5.73 (1 H, s, HC(3,5-Me<sub>2</sub>pz)<sub>2</sub>(SiMe<sub>2</sub>NH<sup>i</sup>Pr)), 4.18 (4 H, br s, thf), 3.67 (1 H, sept, <sup>3</sup>J = 6.5 Hz, HCMe<sub>2</sub>), 2.40 (6 H, s, 5-Me-pz), 2.38 (6 H, s, 3-Me-pz), 2.11 (4 H, br s, thf), 1.26 (6 H, d, <sup>3</sup>J = 6.5 Hz, HCMe<sub>2</sub>), 0.35 (2 H, s, CH<sub>2</sub>SiMe<sub>3</sub>), 0.04 (6 H, s, SiMe<sub>2</sub>), 0.00 (18 H, s, SiMe<sub>3</sub>). <sup>19</sup>F NMR data (CD<sub>2</sub>Cl<sub>2</sub>, 282.1 MHz, 298 K): -133.6 (*o*-C<sub>6</sub>F<sub>5</sub>), -164.1 (*p*-C<sub>6</sub>F<sub>5</sub>), -169.0 (*m*-C<sub>6</sub>F<sub>5</sub>).

**Ethylene polymerisation data**

[Zr(*N*-2,6-C<sub>6</sub>H<sub>3</sub><sup>i</sup>Pr<sub>2</sub>){MeSi(3,5-Me<sub>2</sub>pz)<sub>2</sub>Cl<sub>3</sub>] (**1**). Evaluation of **1** with MAO cocatalyst in toluene gave a productivity in excess of 3120 kg(PE).mol<sup>-1</sup>.h<sup>-1</sup>.bar<sup>-1</sup> (*M*<sub>w</sub> = 336,000; *M*<sub>w</sub>/*M*<sub>n</sub> = 3.1).

[Zr{HC(Me<sub>2</sub>pz)<sub>2</sub>SiMe<sub>2</sub>N<sup>i</sup>Pr}(CH<sub>2</sub>SiMe<sub>3</sub>)<sub>3</sub>] (**4**). Evaluation of **4** with [CPh<sub>3</sub>][BAr<sup>F</sup><sub>4</sub>] cocatalyst in toluene in the presence of Al<sup>i</sup>Bu<sub>3</sub> gave an ethylene polymerisation productivity of 315 kg(PE).mol<sup>-1</sup>.h<sup>-1</sup>.bar<sup>-1</sup> (*M*<sub>w</sub> = 209,000; *M*<sub>w</sub>/*M*<sub>n</sub> = 2.8)
